# Supplementary material
Source: Research Square preprint supplement (doi:10.21203/rs.3.rs-8764114/v1)
Supplement: Supplementary file 1 [file 4a64bd373028e677c0f4fd1b.docx]

**Supporting Information**

**Dissolution process and structural characteristics of residual lignin during soda pulping of sugarcane bagasse at high liquid-to-solid ratio**

Jiali Pu a,1, Zhaoxia Chen b,1, Xin Wang a, Baojie Liu a, Chengrong Qin a, Shuangquan Yao a, Chen Liang a*

*a Guangxi Key Laboratory of Clean Pulp & Papermaking and Pollution Control, School of Light Industrial and Food Engineering, Guangxi University, Nanning, 530004, PR China*

*b School of Energy Chemical Industry and Environment, Sichuan Vocational and Technical College, Suining Sichuan 629000, PR China*

**Corresponding author:* *liangchen[@gxu.edu.cn](mailto:yao@gxu.edu.cn) (Chen Liang)*

*1* *Jiali Pu and Zhaoxia Chen contributed equally to this work.*

**S1. Response surface methodology optimization experimental**

**Table S1. Response surface experimental variables**

| Number | A  Initial alkali concentration (g/L) | B  Maximum temperature (°C) | C  Soaking time (min) |
| --- | --- | --- | --- |
| 1 | 24 | 150 | 15 |
| 2 | 32 | 150 | 60 |
| 3 | 16 | 150 | 60 |
| 4 | 24 | 170 | 15 |
| 5 | 16 | 170 | 60 |
| 6 | 24 | 160 | 60 |
| 7 | 16 | 160 | 105 |
| 8 | 24 | 150 | 105 |
| 9 | 24 | 170 | 105 |
| 10 | 32 | 170 | 60 |
| 11 | 16 | 160 | 15 |
| 12 | 24 | 160 | 60 |
| 13 | 32 | 160 | 105 |
| 14 | 24 | 160 | 60 |
| 15 | 24 | 160 | 60 |
| 16 | 24 | 160 | 60 |
| 17 | 32 | 160 | 15 |

**S2. Calculation formula for screened pulp yield**

The calculation formula for fine pulp yield is as follows:

where 𝐷 is thescreened pulp yield (%), 𝑚 is the mass of the screened pulp (oven-dry), and 𝑚0 is the mass of the raw material (oven-dry).

**S3. Determination of lignin and carbohydrate contents in black liquor**

Determination of lignin content in black liquor: Dilute the black liquor to a certain multiple at room temperature. Use an Agilent 8453 UV spectrophotometer and distilled water as a reference to measure the absorbance at 280 nm. The specific calculation formula is as follows:

Where 𝐵 is the acid-soluble lignin content, g/L; 𝐴 is the absorbance at 280 nm; 𝑘 is the absorbance coefficient, 26; 𝑀 is the dilution factor of black liquor.

Determination of carbohydrate content in black liquor: Use a pipette to accurately measure 200 μL of sample, dissolve it in 10 mL of 4% dilute sulfuric acid solution, seal it and perform acid hydrolysis reaction in an autoclave at 121 °C for 1 h. After hydrolysis, 1 mL of the supernatant is centrifuged at high speed, and the dilution factor of the hydrolyzed solution is adjusted. Then, 1.5 mL of the diluted hydrolyzed solution is filtered through a 0.45 μm aqueous syringe filter and stored in a sample vial for determination. The carbohydrate components in the sample are detected using Thermo Fisher Scientific ICS-5000 Plus. The formula for calculating the sugar content in the liquid sample is as follows:

*C* represents the concentration of monosaccharides in the liquid sample, g/L; *Si* represents the peak area during detection; *Ki* represents the slope of the standard curve for the corresponding monosaccharide*; N* represents the dilution factor after hydrolysis; *Vz* represents the total volume of the liquid during hydrolysis, L; and *Vi* represents the volume of the hydrolyzed liquid sample, mL.

**S4. Calculation formula for lignin content on pulp surface (C1s method)**

The calculation formula for lignin content on the pulp surface is as follows:

|  |
| --- |

where *C1* is the percentage of C1 in the high-resolution C1s spectrum, and 𝛼 is the correction factor for surface contamination, 2.

**S5. Thermogravimetric analysis (TGA) testing method**

Exactly 5 mg of hemicellulose sample was weighed and heated from 40 to 650 °C at a heating rate of 15 K min−1 in a nitrogen environment. The scanning range of the infrared spectrometer was set to 4000 cm−1 to 500 cm−1 with a resolution of 4 cm−1, and the data were analyzed and processed.

**S6. Gel permeation chromatography (GPC) testing method**

The samples were dissolved in 2 mL of triacetate buffer solution and fully dissolved, then filtered through a 0.22 μm filter. A calibration curve was established using standard polystyrene samples. The analysis was performed using a Waters HPLC system equipped with an Ultra Tyra Geller HR column and a Waters 2414 refractive index detector.

**S7. Semi-quantitative calculation by 2D HSQC NMR**

The semi-quantitative formula for lignin linkages is as follows:

where *2IX* represents the integral value of the 2D-HSQC signal for the structure to be quantified, *2IS* represents the integral value of the entire region for the structure to be quantified, 13*C*S represents the integral value of the entire region in the 13C spectrum, 13*C*163-103 represents the integral value of the benzene ring region in the 13C spectrum, and 600 represents 600 aromatic carbons per 100 aromatic rings.

The semi-quantitative calculation formula for the basic structural units of lignin, including guaiacyl (G), syringyl (S), and p-hydroxyphenyl (H), is as follows:

Where *2IG2* represents the 2D-HSQC integral value of the G2 signal, *2IS2,6* represents the 2D-HSQC integral value of the S2,6 signal, and *2IH2,6* represents the 2D-HSQC integral value of the H2,6 signal.

**S8.** **Exploration of response surface optimization for the high material-to-liquid ratio soda cooking process**

**S8.1 Response surface results for the high material-to-liquid ratio soda cooking process**

The yield of fine pulp after cooking, residual alkali, alkali consumption, and Kappa number were used as response values. The experimental results are shown in Table S2.

Table S2. Response surface experiment results

| Number | Screened pulp yield (%) | Black liquor residual alkali (g/L) | Alkali consumption (g/100g) | Kappa number |
| --- | --- | --- | --- | --- |
| 1 | 16.19 | 12.0 | 18.0 | 14.7 |
| 2 | 28.41 | 19.7 | 18.5 | 11.5 |
| 3 | 9.19 | 4.1 | 17.9 | 14.8 |
| 4 | 23.18 | 9.1 | 22.4 | 13.4 |
| 5 | 18.07 | 2.4 | 20.5 | 15.0 |
| 6 | 33.23 | 9.2 | 22.2 | 12.5 |
| 7 | 20.03 | 2.1 | 20.9 | 13.2 |
| 8 | 21.82 | 9.9 | 21.2 | 13.8 |
| 9 | 42.17 | 5.9 | 27.1 | 9.1 |
| 10 | 46.06 | 16.1 | 23.9 | 8.6 |
| 11 | 7.93 | 4.5 | 17.3 | 15.5 |
| 12 | 29.50 | 8.8 | 22.8 | 13.4 |
| 13 | 43.54 | 15.2 | 25.1 | 9.0 |
| 14 | 30.03 | 8.9 | 22.6 | 12.3 |
| 15 | 30.44 | 8.8 | 22.7 | 11.6 |
| 16 | 28.72 | 8.5 | 23.2 | 12.9 |
| 17 | 23.17 | 18.9 | 19.6 | 12.8 |

**S8.2** **Influence of various factors on pulp yield after cyclic cooking**

After the significance test of the fine pulp yield model, the quadratic model was selected. The significance analysis results of the fine pulp yield regression model are shown in Table S3.

After multiple regression analysis of the data, the regression equation of the fine pulp yield (*Y1*) and the initial alkali concentration (*A*), the maximum temperature (*B*), and the soaking time (*C*) was obtained as follows:

The quadratic coefficients in the equation are all less than zero, indicating that there is a maximum value, which meets the actual production needs and can be optimized. As can be seen from Table S3, the regression model p < 0.0001, indicating that the model is significant overall; the lack of fit value is 0.2726, which is greater than 0.05 and not significant, proving the effectiveness of the model. The multiple correlation coefficient R2 = 0.9851, close to 1, indicates that the model can explain 98.51% of the variation in the response value, indicating that the model has good fit and correlation from the experimental results, so that the regression model can be used to predict the pulp yield of high material-to-liquid ratio soda pulping. The coefficient of variation C.V.% = 7.59% shows that the model cannot explain 7.59% of the total variation, which is less than 10%, with high accuracy and strong reliability. The experimental coefficient R2Adj = 0.9661 is close to the predicted coefficient R2Pred = 0.8511, with a difference of less than 0.2, indicating that in the selected quadratic model, the predicted value of pulp yield has a high degree of fit with the experimental value.

**Table 3. Significance analysis of the regression model of pulp yield**

|  | F | p-value |  |
| --- | --- | --- | --- |
| Source | Value | Prob>F |  |
| Model | 51.59 | < 0.0001 | significant |
| A-Initial alkali concentration | 227.10 | < 0.0001 |  |
| B-Maximum temperature | 89.20 | < 0.0001 |  |
| C-Soaking time | 100.17 | < 0.0001 |  |
| AB | 4.72 | 0.0663 |  |
| AC | 4.20 | 0.0796 |  |
| BC | 10.99 | 0.0129 |  |
| A2 | 13.12 | 0.0085 |  |
| B2 | 2.00 | 0.2005 |  |
| C2 | 10.31 | 0.0148 |  |
| Lack of Fit | 1.89 | 0.2726 | not significant |

R2 = 0.9851, R2Adj = 0.9661, R2Pred = 0.8511, C.V.% = 7.59.

According to Table S3, the "Prob > F" values for the quadratic terms A2 and C2 are ≤ 0.05, indicating their significant influence on pulp yield after cooking. Similarly, the "Prob > F" values for the linear terms A, B, and C are also ≤ 0.05, indicating their significant effects on pulp yield after cooking. Based on the corresponding F values for the three factors, the main effects on pulp yield rank in descending order as follows: initial alkali concentration > soaking time > maximum temperature. Furthermore, the analysis of variance reveals an interaction between maximum temperature and soaking time in this model.





**Fig. S1. Response surface plots of the effect of different factor on the pulp yield.**

The 3D surface plot and contour plot of fine pulp yield are shown in Fig S1. When the soaking time is at an intermediate level (60 min), the response surface plot of the initial alkali concentration and the maximum temperature has a larger inclination, a steeper slope, and the contour lines are close to a circle, indicating that the interaction between the initial alkali concentration and the maximum temperature has no significant effect on the pulp yield of the high material-to-liquid ratio soda cooking process. When the maximum temperature is at an intermediate level (160 ℃), the response surface plot of the interaction between the initial alkali concentration and the soaking time on the pulp yield also has a larger inclination, a steeper slope, and the contour lines are close to a circle, indicating that the interaction between the initial alkali concentration and the soaking time on the pulp yield has no significant effect. When the initial alkali concentration is at an intermediate level (24 g/L), the response surface plot of the interaction between the maximum temperature and the soaking time on the pulp yield has a larger inclination, a gentler slope, and dense contour lines, close to an ellipse. This indicates that the interaction between maximum temperature and soaking time has a more significant effect on pulp yield.

**S8.3 Influence of various factors on black liquor residual alkali after cyclic cooking**

After the significance test of the residual alkali in the black liquor was performed, the quadratic model was selected, and the significance analysis results of the residual alkali regression model are shown in Table S4.

**Table S4. Significance analysis of the regression model of residual alkali**

|  | F | p-value |  |
| --- | --- | --- | --- |
| Source | Value | Prob > F |  |
| Model | 345.03 | < 0.0001 | significant |
| A-Initial alkali concentration | 2799.40 | < 0.0001 |  |
| B-Maximum temperature | 128.29 | < 0.0001 |  |
| C-Soaking time | 110.65 | < 0.0001 |  |
| AB | 6.44 | 0.0388 |  |
| AC | 2.72 | 0.1431 |  |
| BC | 1.86 | 0.2148 |  |
| A2 | 50.34 | 0.0002 |  |
| B2 | 3.69 | 0.0962 |  |
| C2 | 5.010E-007 | 0.9995 |  |
| Lack of Fit | 4.09 | 0.1037 | not significant |

R2 = 0.9978, R2Adj = 0.9949, R2Pred = 0.9720, C.V.% = 3.94.

After multiple regression analysis of the data, the regression equation of the residual alkali (*Y*2) and the initial alkali concentration (*A*), the maximum temperature (*B*), and the soaking time (*C*) was obtained as follows:

It is obvious from Table S4 that the regression model has P < 0.0001, indicating its overall significant performance. The lack of fit value of 0.1037 is greater than 0.05 and is not significant, thus confirming the validity of the model. The multiple correlation coefficient R2 = 0.9978, close to 1, indicates that the model can explain 99.78% of the variation of the response variable. This shows that the model has a good fit and correlation with the experimental results, supporting the feasibility of using the regression model to predict the residual alkali of black liquor in the high material-to-liquid ratio soda pulping process. The coefficient of variation C.V.% = 3.94% shows that the model cannot explain 3.94% of the total variation, which is less than 10%, indicating that the model can cover all experimental data, with strong accuracy and high credibility of the result analysis. The experimentally adjusted R2Adj = 0.9949 is very close to the predicted value R2Pred = 0.9720, with a difference of less than 0.2, indicating that the predicted value of black liquor residual alkali using the selected second-order model has a high degree of fit between the predicted value and the experimental value.

According to Table S4, the "Prob>F" value of the quadratic term A2 is ≤ 0.05, which has a significant effect on the residual alkali. The "Prob>F" values ​​of the linear terms A, B, and C are also ≤ 0.05, indicating a significant effect on the residual alkali. From the corresponding F values ​​of the three, it can be seen that the order of their main effects on the residual alkali is: initial alkali concentration > maximum temperature > soaking time. In addition, from the variance analysis, it can be seen that there is an interaction between the initial alkali concentration and the cooking time in this model.





**Fig. S2. Response surface plots of the effect of different factor on the residual alkali.**

The 3D surface plot and contour plot corresponding to the residual alkali are shown in Fig S2. When the cooking time is at the center level (60 min), the response surface plot of the interaction between the initial alkali concentration and the maximum temperature shows a steep slope and an elliptical contour, indicating that the interaction between these two factors on the residual alkali is significant. When the maximum temperature is the center level (160 ° C), the response surface plot of the interaction between the initial alkali concentration and the cooking time shows a steep slope and linear contours, indicating that the interaction between these factors on the residual alkali is not significant. When the initial alkali concentration is at the center level (24 g/L), the response surface plot of the interaction between the maximum temperature and the cooking time shows a gentle slope and circular contours, indicating that the interaction between these factors on the residual alkali is also not significant.

**S8.4 Influence of various factors on alkali consumption after cyclic cooking**

After the significance test of alkali consumption, the quadratic function was selected, and the results of the significance analysis of the alkali consumption regression model are shown in Table S5.

After multiple regression analysis of the data, the regression equation of the alkali consumption (*Y3*) and the initial alkali concentration (*A*), the maximum temperature (*B*), and the soaking time (*C*) was obtained as follows:

As can be seen from Table S5, it is evident that the regression model has P<0.0001, indicating that the overall performance is very significant. The lack of fit term is 0.1037, which is greater than 0.05 and therefore not significant, confirming the validity of the model. The multiple correlation coefficient R2 = 0.9803, which is close to 1, indicating that the model can explain 98.03% of the variance of the response variable. This shows that the experimental results obtained by the model have a good fit and correlation, enabling it to predict the alkali consumption in the high bath ratio kraft cooking process. The coefficient of variation C.V.% = 2.65% shows that only 2.65% of the total variation cannot be explained by the model, indicating the accuracy and high reliability of the model in analyzing the experimental results. The adjusted R2Adj = 0.9551 and the prediction coefficient R2Pred = 0.7554 differ by less than 0.2, indicating that the alkali consumption after high liquor ratio kraft cooking can be predicted using the selected second-order model, and there is a good fit between the predicted values ​​and the experimental values.

As shown in Table S5, the "Prob>F" of the quadratic term A2 and its corresponding linear term A is ≤ 0.05, indicating that the initial alkali concentration has the most significant effect on the alkali consumption during the cooking process. According to the F values ​​corresponding to the three factors, the main effect relationship on alkali consumption is from small to large: maximum temperature < soaking time < initial alkali concentration. The variance analysis also found that there was an interaction between the initial alkali concentration and the maximum temperature in the model.

**Table S5. Significance analysis of the regression model of alkali consumption**

|  | F | p-value |  |
| --- | --- | --- | --- |
| Source | Value | Prob > F |  |
| Model | 38.80 | < 0.0001 | significant |
| A-Initial alkali concentration | 43.34 | 0.0003 |  |
| B-Maximum temperature | 128.29 | < 0.0001 |  |
| C-Soaking time | 110.65 | < 0.0001 |  |
| AB | 6.44 | 0.0388 |  |
| AC | 2.72 | 0.1431 |  |
| BC | 1.86 | 0.2148 |  |
| A2 | 50.34 | 0.0002 |  |
| B2 | 3.69 | 0.0962 |  |
| C2 | 5.010E-007 | 0.9995 |  |
| Lack of Fit | 4.09 | 0.1037 | not significant |

R2 = 0.9803, R2Adj = 0.9551, R2Pred = 0.7554, C.V.% = 2.65.





**Fig. S3. Response surface plots of the effect of different factor on the alkali consumption.**

The 3D surface plot and contour plot of alkali consumption are shown in Fig S3. When the soaking time is at the center level (60 min), the response surface plot of the interaction between the initial alkali concentration and the maximum temperature on the alkali consumption presents a steep slope, and the contour lines are elliptical, indicating the interaction between the initial alkali concentration and the maximum temperature. The maximum temperature significantly affects the alkali consumption during the high material-to-liquid ratio soda cooking process. When the maximum temperature is at the center level (160 °C), the response surface plot of the interaction between the initial alkali concentration and the soaking time on the alkali consumption presents a steep slope, and the contour lines are close to circles, indicating the interaction between the initial alkali concentration and the soaking time on the alkali consumption. Concentration and soaking time significantly affect alkali consumption. When the initial alkali concentration is at the central level (24 g/L), the response surface diagram of the interaction between the maximum temperature and the soaking time on the alkali consumption shows a gentle slope and the contour lines are close to a circle, indicating that the interaction between the maximum temperature and the soaking time has a gentle slope on the alkali consumption, and the contour lines are close to a circle. Temperature and soaking time have little effect on alkali consumption.

**S8.5 Influence of various factors on kappa number after cyclic cooking**

After the significance test of kappa number, the quadratic function was selected, and the results of the significance analysis of the alkali consumption regression model are shown in Table S6.

After multiple regression analysis of the data, the regression equation of the kappa number (*Y4*) and the initial alkali concentration (*A*), the maximum temperature (*B*), and the soaking time (*C*) was obtained as follows:

As shown in Table S6, the P value of the regression model is 0.0017, which is less than 0.01, indicating that the model is significant as a whole. The loss of fit value is 0.2922, which is greater than 0.05, indicating that the model is not significant and has a certain significance. The multiple correlation coefficient R2 = 0.9401, indicating that the model has a good fit and correlation with the experimental results. The model can be used to predict the kappa number in the high material-to-liquid ratio soda cooking process. The coefficient of variation C.V.% = 6.18% indicates that 6.18% of the total variation cannot be explained by the model, which is less than 10%, indicating that the model can cover all experimental data with high accuracy and reliability and can be used to analyze the experimental results.

**Table S6. Significance analysis of the regression model of kappa number**

|  | F | p-value |  |
| --- | --- | --- | --- |
| Source | Value | Prob>F |  |
| Model | 12.21 | 0.0017 | significant |
| A-Initial alkali concentration | 57.48 | 0.0001 |  |
| B-Maximum temperature | 15.82 | 0.0053 |  |
| C-Soaking time | 26.52 | 0.0013 |  |
| AB | 3.97 | 0.0865 |  |
| AC | 0.91 | 0.3731 |  |
| BC | 4.92 | 0.0621 |  |
| A2 | 0.061 | 0.8118 |  |
| B2 | 0.010 | 0.9214 |  |
| C2 | 0.20 | 0.6696 |  |
| Lack of Fit | 1.77 | 0.2922 | not significant |

R2 = 0.9401, R2Adj = 0.8631, R2Pred = 0.4136, C.V.% = 6.18%.





**Fig. S4. Response surface plots of the effect of different factor on the kappa number.**

The 3D surface plot and contour plot of kappa number are shown in Fig S4. When the soaking time is at an intermediate level (60 min), the effect of the interaction between the initial alkali concentration and the maximum temperature on the kappa number presents a sloping response surface with a large slope and the contour lines are approximately circular, indicating that the interaction between the initial alkali concentration and the maximum temperature has no significant effect on the kappa number. When the maximum temperature is at an intermediate level (160 °C), the response surface of the interaction between the initial alkali concentration and the soaking time on the kappa number presents a sloping response surface with a slope approximately circular, indicating that the interaction between the initial alkali concentration and the soaking time has a significant effect on the kappa number. When the initial alkali concentration is at an intermediate level (24 g/L), the response surface of the interaction between the maximum temperature and the soaking time on the kappa number presents a gently sloping surface, and the contour lines are approximately circular, indicating that the interaction between the maximum temperature and the soaking time in the high material-to-liquid ratio soda cooking process has no significant effect on the kappa number.

**S8.6 Response surface model analysis and confirmatory experiment**

Based on the response surface analysis, the model suggested a favorable set of cooking conditions within the experimental design space, corresponding to an initial alkali concentration of 29.2 g/L, a maximum temperature of 164.3 °C, and a soaking time of 85.9 min. Under these conditions, the response surface model predicted the following response values: pulp yield of 51.82%, residual alkali concentration of 11.55 g/L, alkali consumption of 26.43 g/ 100 g, and a kappa number of 8.34.

**S9. Low-resolution scanning spectra of the surface of bagasse pulp fibers**


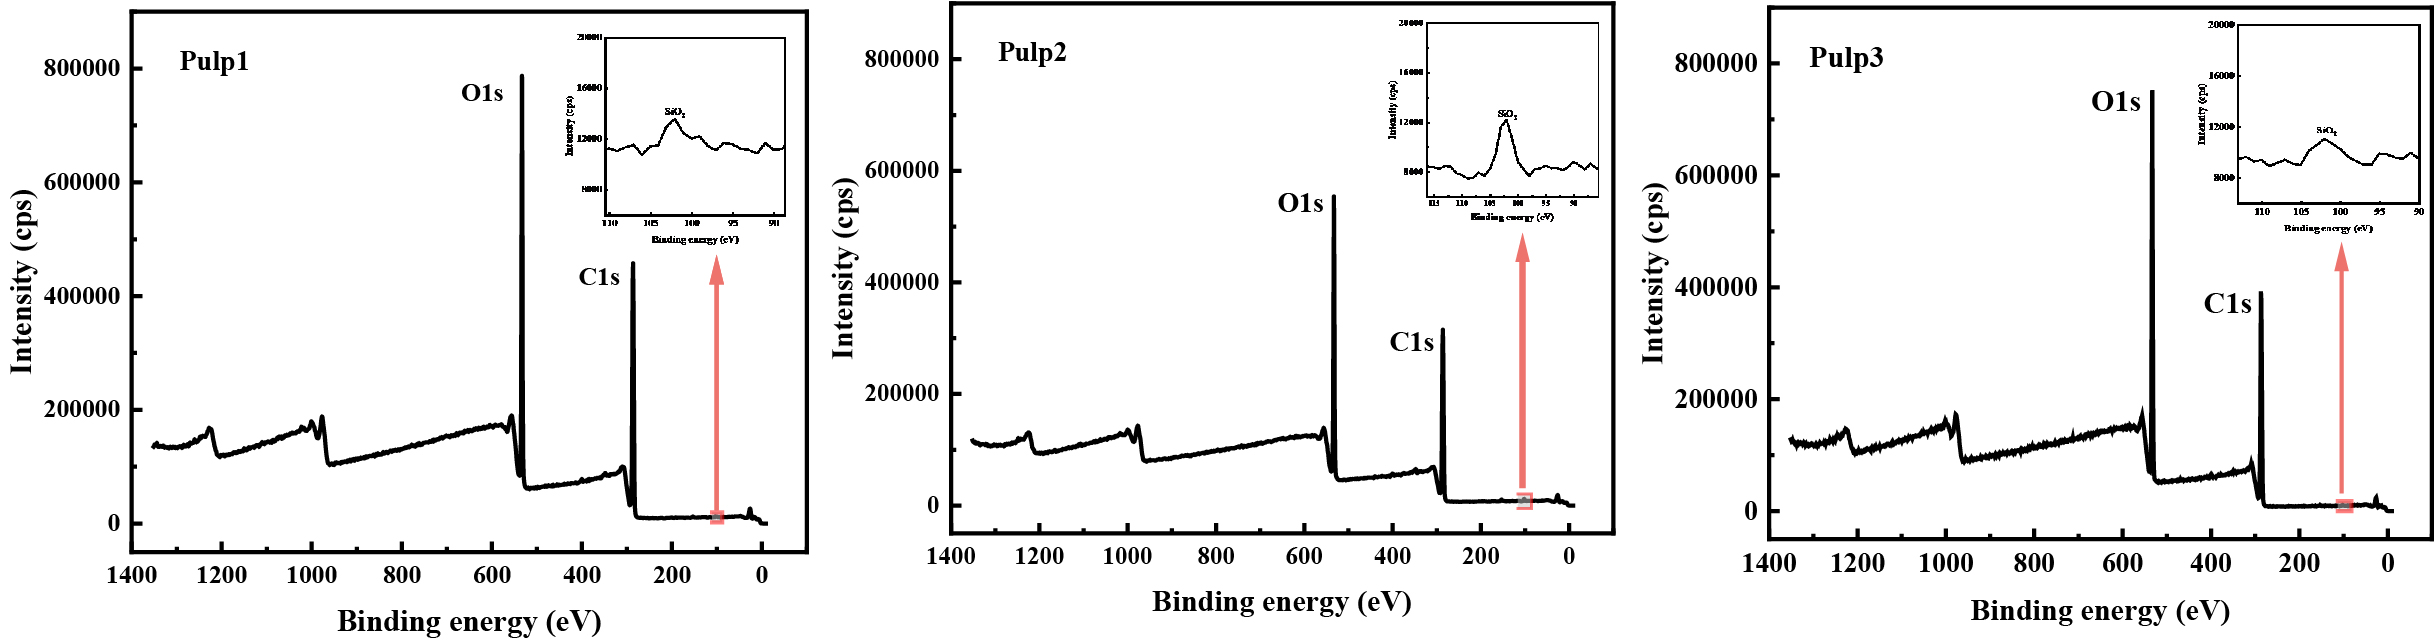


**Fig. S5. Low-resolution scanning spectra of sample fiber surfaces**

**S10.** **Analysis of residual lignin molecular weight in bagasse pulp**

The weight average molecular weights (Mw) and number average molecular weights (Mn) of the two EAL samples were determined by GPC, and the polydispersity index (Mw/Mn) was calculated. The data are shown in Table S7.

**Table S7. Comparison of sample molecular weights**

|  | EAL-5 | EAL-10 |
| --- | --- | --- |
| Mw (g/mol) | 6973 | 6435 |
| Mn (g/mol) | 3056 | 2908 |
| Mw/Mn | 2.28 | 2.21 |

**S11. Thermal stability analysis of residual lignin in bagasse pulp**

**
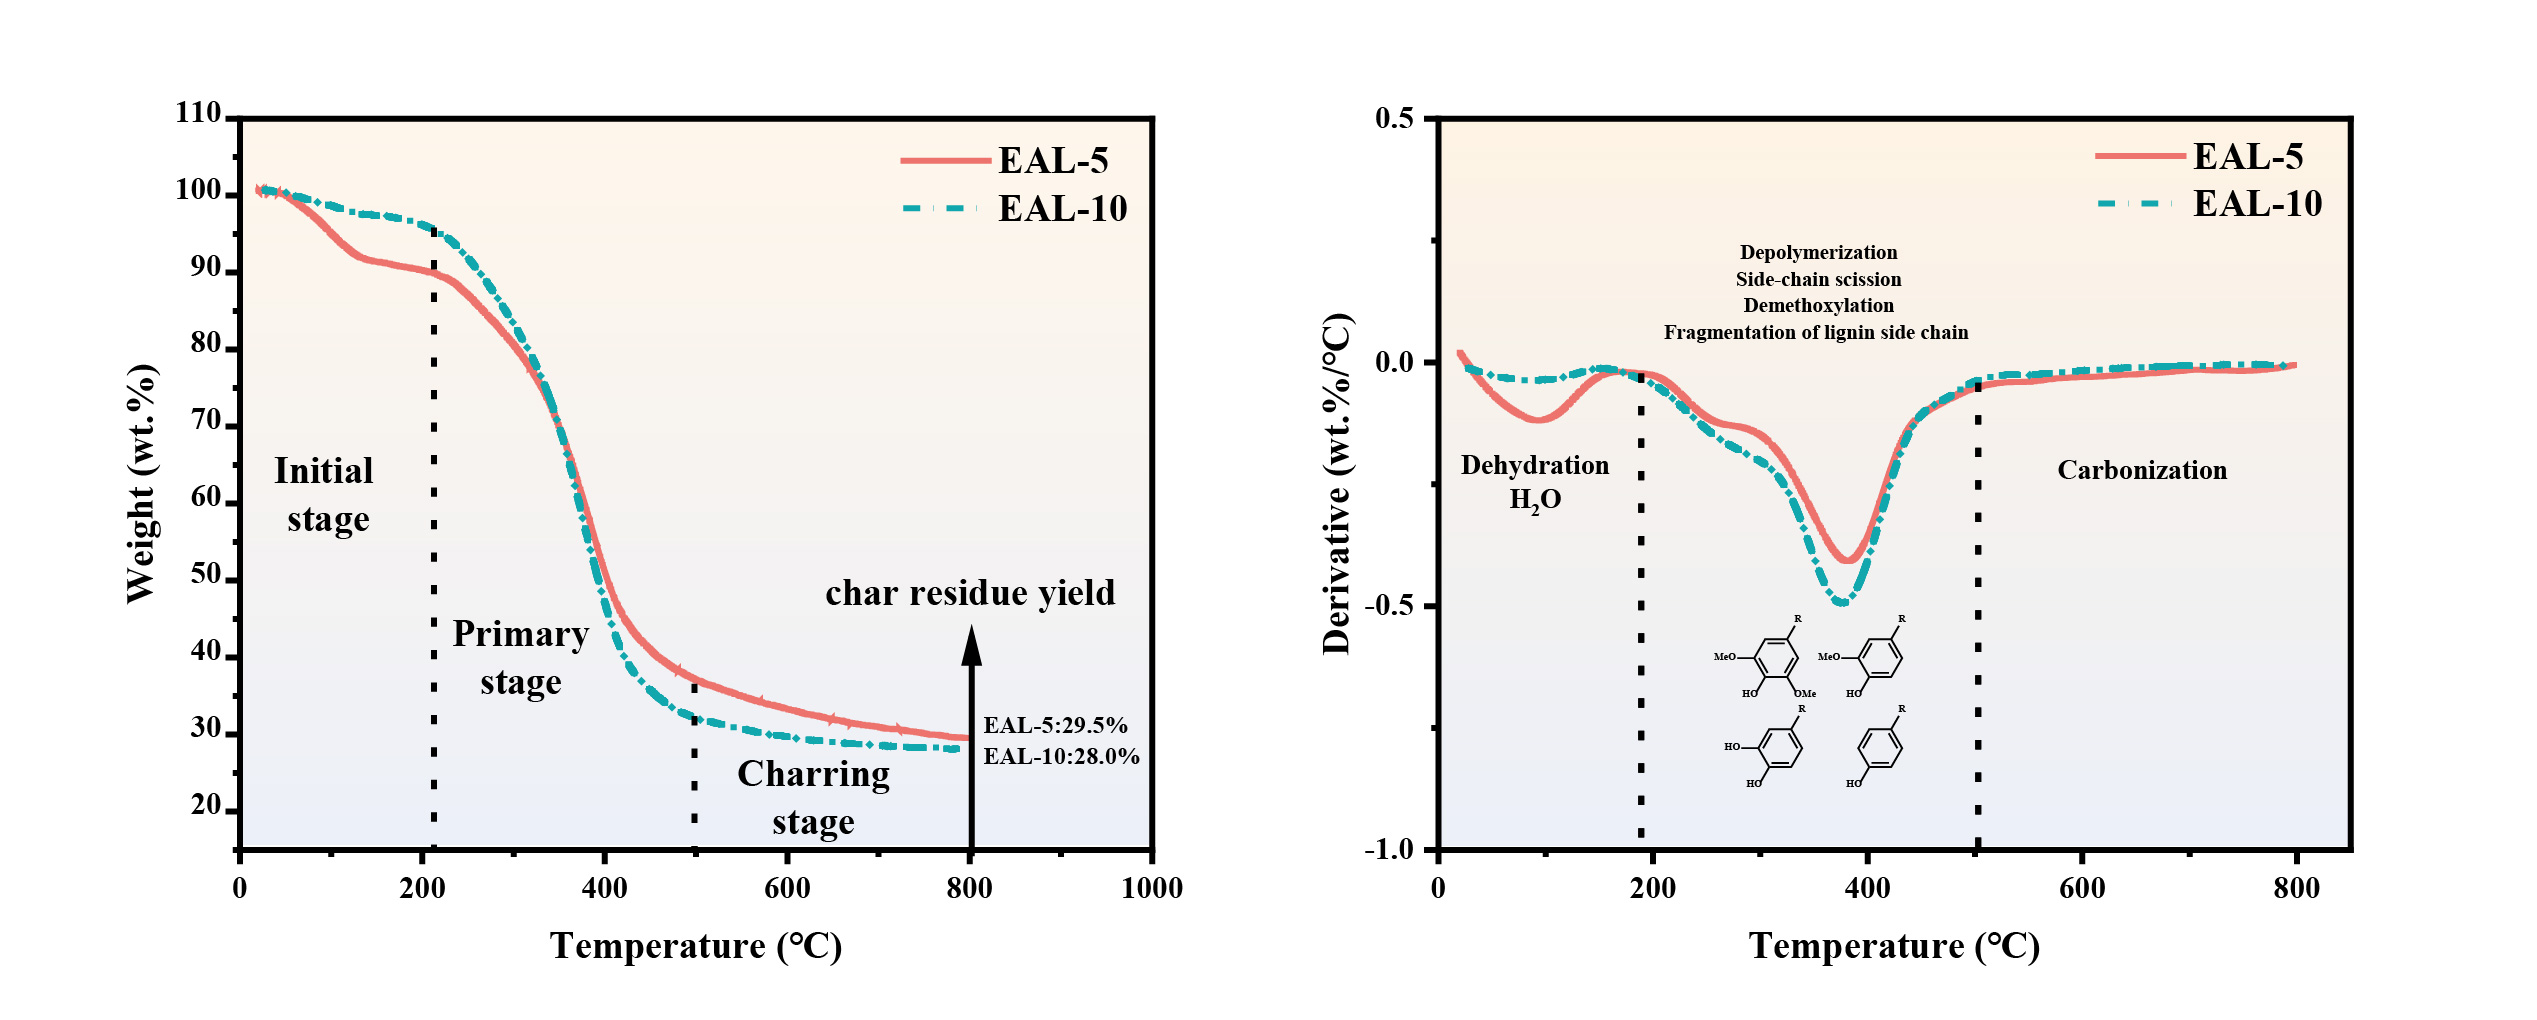
**

**Fig. S6. Thermal stability analysis of different samples**

S12. Assignment of 13C-1H signal in 2D HSQC NMR spectra of different EAL

Table S8. Assignment of 13C-1H signal in 2D HSQC NMR spectra of different EAL

| Lable | δC/δH (ppm) | Assignments |
| --- | --- | --- |
| -OCH3 | 55.6/3.73 | C-H in methoxyls |
| Aα | 71.7/4.87 | Cα–Hα in β-O-4 unit (A) |
| Aβ(S) | 85.8/4.13 | Cβ-Hβ in β-O-4 linked to S (A, Erythro) |
| 86.7/4.00 | Cβ-Hβ in β-O-4 linked to S (A, Thero) |
| Aβ(G) | 84.2/4.27 | Cβ-Hβ in β-O-4 linked to G (A) |
| Aγ | 58.5-62.4/3.3-3.8 | Cγ-Hγ in β-O-4 substructures (A) |
| Bα | 85.0/4.64 | Cα-Hα in β-β resinol (B) |
| Bβ | 53.6/3.05 | Cβ-Hβ in β-β resinol (B) |
| Bγ | 70.8/3.84 and 4.18 | Cγ-Hγ in β-β resinol (B) |
| Cα | 86.8/5.46 | Cα-Hα in phenylcoumaran (C) |
| Cβ | 53.1/3.48 | Cβ-Hβ in phenylcoumaran (C) |
| Cγ | 62.6/3.28 | Cγ-Hγ in phenylcoumaran (C) |
| Dα | 81.8/4.88 | Cα-Hα in spirodienone (D) |
| Eα | 78.6/5.56 | Cα-Hα in α,β-diaryl ethers (E) |
| S2,6 | 104.0/6.71 | C2,6-H2,6 in syringyl units (S) |
| S’2,6 | 105.8/7.32 | C2,6-H2,6 in oxidized S units (S’) |
| G2 | 111.0/7.01 | C2-H2 in guaiacyl units (G) |
| G2’ | 112.0/7.24 | C2-H2 in oxidized G units (G’) |
| G5 | 115.6/6.93 | C5-H5 in guaiacyl units (G) |
| G6 | 118.7/6.85 | C6-H6 in guaiacyl units (G) |
| H2,6 | 127.1/7.18 and 127.9/7.00 | C2,6-H2,6 in H units (H) |
| FA2 | 111.1/7.29 | C2-H2 in ferulate (FA) |
| FA6 | 121.8/7.12 | C6-H6 in ferulate (FA) |
| PCA2,6 | 129.5/7.54 | C2,6-H2,6 in p-coumarate (PCA) |
| PB2,6 | 131.3/7.67 | C2,6-H2,6 in p-hydrobenzonic acid (PB) |
| PCAβ and FAβ | 116.4 and 114.2/6.32 | Cβ-Hβ in p-coumarate (PCA) and ferulat(FA) |
| PCAα and FAα | 143.5/7.48 | Cα-Hα in p-coumarate (PCA) and ferulate (FA) |
